# Supplementary material for: Strategies to Manage Ecotourism Sustainably: Insights from a SWOT-ANP Analysis and IUCN Guidelines
Source: MDPI journal article supplement (doi:10.3390/su151411013), 2023-07-13
Supplement: s1 [file s1]

Archive with 1 entries (1 files):
- sustainability-2478617-supplementary.pdf
