# Supplementary material for: Strategies to Manage Ecotourism Sustainably: Insights from a SWOT-ANP Analysis and IUCN Guidelines
Source: MDPI journal article supplement (doi:10.3390/su151411013), 2023-07-13
Supplement: s1 [file s1 › sustainability-2478617-supplementary.pdf]

## Strategies to Manage Ecotourism Sustainably: Insights from a SWOT-ANP Analysis and IUCN Guidelines

**Table S1.** Details of respondents ( $n = 40$ ).

| Type of organization | Organization                                           | Number of Participants |
|----------------------|--------------------------------------------------------|------------------------|
| Governmental         | Department of the Environment of Tehran Province       | 6                      |
|                      | Administration of natural resources of Tehran province | 4                      |
|                      | Municipality of Tehran metropolis                      | 4                      |
|                      | Universities (academic experts)                        | 8                      |
|                      | Bureau of Tourism Education and Planning               | 3                      |
|                      | Administration of Natural Heritage Conservation        | 3                      |
| Non-governmental     | Society of Iranian Tourism                             | 3                      |
|                      | Association of adventurous tourism of Tehran           | 2                      |
|                      | Home of Tourism of Tehran                              | 2                      |
| Tourism Industry     | Travel agencies of Tehran                              | 5                      |

**Table S2.** List of dimensions, variables, and indicators of negative impacts of ecotourism for four different Protected Areas in Iran.

| Dimensions             | Variables               | Indicators                                                                                   | References                                                                                                                                                                                                                                                                                   |
|------------------------|-------------------------|----------------------------------------------------------------------------------------------|----------------------------------------------------------------------------------------------------------------------------------------------------------------------------------------------------------------------------------------------------------------------------------------------|
| Physical-environmental | Environmental pollution | (1) Increase of environmental pollution (water, soil, air, noise, visual)                    | Butler (1999); Innes & Booher (2000); Bell & Morse (2001); Miller (2001); Yoon et al. (2001); Céron & Dubois (2003); Dhakal & Imura (2003); Gabrielsen & Bosch (2003); Ko (2005); White et al. (2006); Castellani & Sala (2010); Lee & Hsieh (2016); Wang et al. (2016); Zhang et al. (2017) |
|                        | Ecosystem               | (2) Increase of destruction of natural ecosystems (mountains, forests, deserts, wetlands)    |                                                                                                                                                                                                                                                                                              |
|                        |                         | (3) Increase of change in ecosystem structure and function                                   |                                                                                                                                                                                                                                                                                              |
|                        |                         | (4) Decrease of ecosystem services                                                           |                                                                                                                                                                                                                                                                                              |
|                        |                         | (5) Increase of habitat devastation                                                          |                                                                                                                                                                                                                                                                                              |
|                        |                         | (6) Increase of habitat fragmentation                                                        |                                                                                                                                                                                                                                                                                              |
|                        |                         | (7) Increase of land use/land cover (LULC) changes                                           |                                                                                                                                                                                                                                                                                              |
|                        | Wildlife habitat        | (8) Increase of wildlife hunting (poaching)                                                  |                                                                                                                                                                                                                                                                                              |
|                        |                         | (9) Increase of species extinction                                                           |                                                                                                                                                                                                                                                                                              |
|                        |                         | (10) Increase of wildlife migration                                                          |                                                                                                                                                                                                                                                                                              |
|                        | Vegetation              | (11) Increase of change in wildlife behaviour (feeding, migration, reproduction)             |                                                                                                                                                                                                                                                                                              |
|                        |                         | (12) Decrease of quality of vegetation                                                       |                                                                                                                                                                                                                                                                                              |
|                        |                         | (13) Increase of cut down trees and shrubs                                                   |                                                                                                                                                                                                                                                                                              |
|                        |                         | (14) Decrease of high-density pasture                                                        |                                                                                                                                                                                                                                                                                              |
|                        | Biodiversity            | (15) Increase of fires in forests and pastures                                               |                                                                                                                                                                                                                                                                                              |
|                        |                         | (16) Decrease of biodiversity                                                                |                                                                                                                                                                                                                                                                                              |
| Socio-cultural         | Resources consumption   | (17) Decrease of rare or dominant species                                                    | Hall (2000); Yoon et al. (2001); Céron & Dubois (2003); Lee (2009); Taghvaei & Akbari (2010); Sigala (2012); Tanguay et al. (2013); Mascarenhas et al. (2015); Zhang et al. (2020)                                                                                                           |
|                        |                         | (18) Decrease of renewable resources (water, soil, air)                                      |                                                                                                                                                                                                                                                                                              |
|                        |                         | (19) Increase of water resource consumption                                                  |                                                                                                                                                                                                                                                                                              |
|                        | Waste and sewage        | (20) Increase of energy consumption and types of fuels                                       |                                                                                                                                                                                                                                                                                              |
|                        |                         | (21) Increase of waste generated by ecotourism                                               |                                                                                                                                                                                                                                                                                              |
|                        | Safety                  | (22) Increase of sewage generated by ecotourism                                              |                                                                                                                                                                                                                                                                                              |
|                        |                         | (23) Increase of accident rates                                                              |                                                                                                                                                                                                                                                                                              |
|                        |                         | (24) Increase of road traffic                                                                |                                                                                                                                                                                                                                                                                              |
|                        | Environment/protection  | (25) Decrease of access to emergency services                                                |                                                                                                                                                                                                                                                                                              |
|                        |                         | (26) Decrease of environmental health level                                                  |                                                                                                                                                                                                                                                                                              |
|                        |                         | (27) Increase of destruction of natural, cultural, historical and man-made attractions       |                                                                                                                                                                                                                                                                                              |
|                        |                         | (28) Increase of visiting time and presence of tourists in PAs                               |                                                                                                                                                                                                                                                                                              |
|                        |                         | (29) Increase of threat to strict natural zones and sensitive habitats                       |                                                                                                                                                                                                                                                                                              |
|                        |                         | (30) Increased numbers of tourists in PAs                                                    |                                                                                                                                                                                                                                                                                              |
|                        | Access                  | (31) Increase of tourists visit to the area                                                  |                                                                                                                                                                                                                                                                                              |
|                        |                         | (32) Decrease of access to facilities and tourism infrastructure                             |                                                                                                                                                                                                                                                                                              |
|                        | Security                | (33) Increase of road infrastructures and transportation networks                            |                                                                                                                                                                                                                                                                                              |
|                        |                         | (34) Increase of constructions and tourist accommodation                                     |                                                                                                                                                                                                                                                                                              |
|                        | Culture                 | (1) Decrease of social security                                                              |                                                                                                                                                                                                                                                                                              |
|                        |                         | (2) Decrease of tourist educational programmes                                               |                                                                                                                                                                                                                                                                                              |
|                        | Satisfaction            | (3) Decrease of novel cultural and moral values among local residents                        |                                                                                                                                                                                                                                                                                              |
|                        |                         | (4) Decrease of loyalty to local values and traditions                                       |                                                                                                                                                                                                                                                                                              |
|                        | Participation           | (5) Increase of change in cultural of local communities from the current situation           |                                                                                                                                                                                                                                                                                              |
|                        |                         | (6) Increase of change in quality of life standards                                          |                                                                                                                                                                                                                                                                                              |
|                        | Justice                 | (7) Decrease of satisfaction of local communities                                            |                                                                                                                                                                                                                                                                                              |
|                        |                         | (8) Decrease of participation in nature protection and development of sustainable ecotourism |                                                                                                                                                                                                                                                                                              |
|                        | Population              | (9) Decrease of access to facilities and local infrastructure                                |                                                                                                                                                                                                                                                                                              |
|                        |                         | (10) Decrease of access to facilities and educational services                               |                                                                                                                                                                                                                                                                                              |
|                        |                         | (11) Increase of change in job opportunities for local communities                           |                                                                                                                                                                                                                                                                                              |
|                        |                         | (12) Decrease of local household income                                                      |                                                                                                                                                                                                                                                                                              |
|                        |                         | (13) Increase of cost of local households                                                    |                                                                                                                                                                                                                                                                                              |
|                        |                         | (14) Increase of migration of local residents                                                |                                                                                                                                                                                                                                                                                              |

|                        |                        |                                                                                                                   |                                |
|------------------------|------------------------|-------------------------------------------------------------------------------------------------------------------|--------------------------------|
| Economic-institutional |                        | (15) Increase of change in density of local residents                                                             |                                |
|                        | Employment and income  | (1) Increase of change in various employments                                                                     |                                |
|                        |                        | (2) Increase of economic pressure among households                                                                |                                |
|                        |                        | (3) Increase of change in income of local communities                                                             |                                |
|                        | Cooperation            | (4) Increase of conflicts among governmental and non-governmental organisations                                   |                                |
|                        |                        | (5) Decrease of cooperation among governmental and non-governmental organisations in planning and decision making | Bottrill & Perace (1995); Hall |
|                        | Monitoring and control | (6) Decrease of monitoring and control in protection of the area                                                  | (2000); Céron & Dubois         |
|                        |                        | (7) Decrease of monitoring and control on ecotourism activities                                                   | (2003); Taghvaei & Akbari      |
|                        | Rules and regulations  | (8) Decrease of attention to protective rules and regulations                                                     | (2010); Chávez-Cortés &        |
|                        |                        | (9) Decrease of implementation of strict legal guidelines                                                         | Maya (2010); Torres-Delgado    |
|                        |                        | (10) Decrease of access to local laws and regulations                                                             | & Palomeque (2014);            |
|                        |                        | (11) Decrease of adherence to laws and regulations                                                                | Mascarenhas et al. (2015);     |
|                        | Institutional element  | (12) Decrease of quality of governmental and non-governmental institutional performance                           | Zhang et al. (2017); Tucker    |
|                        |                        | (13) Decrease of quality of managers performance in training and information                                      | (2020); Qiu et al. (2020)      |
|                        |                        | (14) Decrease of quality of environmental guardians' performance in protection of area                            |                                |
|                        | Local prices           | (15) Increase of prices, including commodities, accommodations, and property                                      |                                |
|                        | Economic activity      | (16) Increase of change in economic activities and income                                                         |                                |
|                        | Ethical principle      | (17) Decrease of beliefs and notice of ethical principles                                                         |                                |

**Table S3.** Relative preference values for pairwise comparisons (adapted from Saaty, 1996).

| Intensity of importance | Definition             | Explanation                                                                        |
|-------------------------|------------------------|------------------------------------------------------------------------------------|
| 1                       | Equal importance       | Two activities contribute equally to objective                                     |
| 3                       | Moderate importance    | Experience and judgment slightly favour one over another                           |
| 5                       | Strong importance      | Experience and judgment strongly favour one over another                           |
| 7                       | Very strong importance | Activity is strongly favoured and its dominance is demonstrated in practice        |
| 9                       | Absolute importance    | Importance of one over another affirmed on the highest possible order              |
| 2,4,6,8                 | Intermediate values    | Used to represent compromise between the priorities listed above 1, 3, 5, 7, and 9 |

**Table S4.** Descriptive profile of the respondents ( $n = 40$ )

| Characteristics               |                                                                                | Frequency (n) | Percentage |
|-------------------------------|--------------------------------------------------------------------------------|---------------|------------|
| Gender                        | Male                                                                           | 27            | 67         |
|                               | Female                                                                         | 13            | 33         |
| Age                           | Less than 30 years old                                                         | 6             | 15         |
|                               | 30-40 years old                                                                | 9             | 22         |
|                               | 40-50 years old                                                                | 18            | 45         |
|                               | More than 50 years old                                                         | 7             | 18         |
| Education                     | Bachelor's degree                                                              | 2             | 5          |
|                               | Master's degree                                                                | 18            | 45         |
|                               | Ph.D. degree                                                                   | 20            | 50         |
| Employment                    | Employed in the Department of the Environment of Tehran Province               | 14            | 35         |
|                               | Employed in Cultural Heritage, Tourism, and Handicrafts Administration of Iran | 6             | 15         |
|                               | Employed at a university (academic experts)                                    | 20            | 50         |
| Tourism Management Experience | Less than 5 years                                                              | 8             | 20         |
|                               | 5-10 years                                                                     | 9             | 23         |
|                               | 10-20 years                                                                    | 16            | 40         |
|                               | More than 20 years                                                             | 7             | 17         |

**Table S5.** Mean levels for ecotourism impact indicators (total = 66 indicators) based on 5-point Likert scale ratings (very low to very high) by tourism management experts ( $n = 40$ ) for four different protected areas in Iran (results of round 1 of Delphi method). Gray highlights indicate the highest mean values, meaning the greatest impacts.

| Dimensions             | Variables               | Indicators                                                                                      | Lar National Park |      | Jajrud Protected Area with Sustainable Use of Natural Resources Areas |      | Tangeh Vashi National Natural Monument |      | Kavdeh Wildlife Refuge |      |
|------------------------|-------------------------|-------------------------------------------------------------------------------------------------|-------------------|------|-----------------------------------------------------------------------|------|----------------------------------------|------|------------------------|------|
|                        |                         |                                                                                                 | Mean dimensions   | Mean | Mean dimensions                                                       | Mean | Mean dimensions                        | Mean | Mean dimensions        | Mean |
| Physical-environmental | Environmental pollution | (1) Increase of environmental pollution (water, soil, air, noise, and visual)                   |                   | 3.44 |                                                                       | 4.45 |                                        | 4.77 |                        | 3.88 |
|                        |                         | (2) Increase of destruction of natural ecosystems (e.g., mountains, forests, deserts, wetlands) |                   | 2.26 |                                                                       | 4.44 |                                        | 4.35 |                        | 3.77 |
|                        |                         | (3) Increase of change in ecosystem structure and function                                      |                   | 3.80 |                                                                       | 4.62 |                                        | 4.25 |                        | 3.65 |
|                        | Ecosystem               | (4) Decrease of ecosystem services                                                              |                   | 2.32 |                                                                       | 3.83 |                                        | 4.11 |                        | 3.34 |
|                        |                         | (5) Increase of habitat devastation                                                             |                   | 1.24 |                                                                       | 1.30 |                                        | 1.30 |                        | 1.23 |
|                        |                         | (6) Increase of habitat fragmentation                                                           |                   | 2.21 |                                                                       | 4.53 |                                        | 4.08 |                        | 4.15 |
|                        |                         | (7) Increase of land use/land cover (LULC) changes                                              |                   | 1.98 |                                                                       | 4.75 |                                        | 3.75 |                        | 3.20 |
|                        |                         | (8) Increase of wildlife hunting (poaching)                                                     |                   | 3.68 |                                                                       | 3.48 |                                        | 3.23 |                        | 4.85 |
|                        | Wildlife habitat        | (9) Increase of species extinction                                                              |                   | 3.58 |                                                                       | 3.64 |                                        | 3.28 |                        | 4.62 |
|                        |                         | (10) Increase of wildlife migration                                                             |                   | 3.88 |                                                                       | 3.58 |                                        | 2.46 |                        | 4.76 |
|                        |                         | (11) Increase of change in wildlife behaviour (feeding, migration, reproduction)                |                   | 3.62 |                                                                       | 3.54 |                                        | 3.04 |                        | 4.52 |
|                        | Vegetation              | (12) Decrease of quality of vegetation                                                          |                   | 4.30 |                                                                       | 3.38 |                                        | 2.15 |                        | 3.18 |
|                        |                         | (13) Increase of cut down trees and shrub                                                       |                   | 4.22 |                                                                       | 3.37 |                                        | 3.35 |                        | 3.11 |
|                        |                         | (14) Decrease of high-density pasture                                                           |                   | 4.41 |                                                                       | 3.45 |                                        | 3.66 |                        | 2.94 |
|                        |                         | (15) Increase of fires in forests and pastures                                                  |                   | 3.25 |                                                                       | 3.96 |                                        | 1.45 |                        | 2.84 |
|                        | Biodiversity            | (16) Decrease of biodiversity                                                                   |                   | 3.40 |                                                                       | 3.26 |                                        | 3.56 |                        | 4.48 |
|                        |                         | (17) Decrease of rare or dominant species                                                       | 2.72              | 3.34 | 3.10                                                                  | 3.18 | 3.03                                   | 3.42 | 2.83                   | 3.54 |
|                        |                         | (18) Decrease of renewable resources (water, soil, air)                                         |                   | 2.36 |                                                                       | 2.86 |                                        | 3.38 |                        | 2.72 |
|                        | Resources consumption   | (19) Increase of water resource consumption                                                     |                   | 1.85 |                                                                       | 2.90 |                                        | 3.33 |                        | 2.68 |
|                        |                         | (20) Increase of energy consumption and types of fuels                                          |                   | 3.28 |                                                                       | 2.80 |                                        | 2.20 |                        | 2.47 |
|                        | Waste and sewage        | (21) Increase of waste generated by ecotourism                                                  |                   | 3.22 |                                                                       | 2.75 |                                        | 3.78 |                        | 2.33 |
|                        |                         | (22) Increase of sewage generated by ecotourism                                                 |                   | 1.65 |                                                                       | 2.60 |                                        | 3.67 |                        | 2.26 |
|                        | Safety                  | (23) Increase of accident rates                                                                 |                   | 2.77 |                                                                       | 1.33 |                                        | 3.55 |                        | 1.87 |
|                        |                         | (24) Increase of road traffic                                                                   |                   | 2.85 |                                                                       | 1.45 |                                        | 2.22 |                        | 1.60 |
|                        |                         | (25) Decrease of access to emergency services                                                   |                   | 1.54 |                                                                       | 1.60 |                                        | 2.27 |                        | 1.34 |
|                        | Environment/Protection  | (26) Decrease of environmental health level                                                     |                   | 1.08 |                                                                       | 1.15 |                                        | 1.26 |                        | 1.17 |
|                        |                         | (27) Increase of destruction of natural, cultural, historical, and man-made attractions         |                   | 2.83 |                                                                       | 2.41 |                                        | 3.48 |                        | 2.11 |
|                        |                         | (28) Increase of visiting time and presence of tourists in PAs                                  |                   | 2.54 |                                                                       | 2.45 |                                        | 3.45 |                        | 2.20 |
|                        |                         | (29) Increase of threat to strict natural zones and sensitive habitats                          |                   | 3.18 |                                                                       | 2.62 |                                        | 3.18 |                        | 3.95 |
|                        |                         | (30) Increased numbers of tourists in PAs                                                       |                   | 2.51 |                                                                       | 2.48 |                                        | 3.72 |                        | 1.72 |
|                        |                         | (31) Increase of tourists visit to the area                                                     |                   | 1.15 |                                                                       | 1.23 |                                        | 1.36 |                        | 1.27 |
|                        | Access                  | (32) Decrease of access to facilities and tourism infrastructure                                |                   | 1.32 |                                                                       | 3.22 |                                        | 1.48 |                        | 1.43 |
|                        |                         | (33) Increase of road infrastructures and transportation networks                               |                   | 2.25 |                                                                       | 4.48 |                                        | 2.42 |                        | 1.66 |
|                        |                         | (34) Increase of constructions and tourist accommodation                                        |                   | 1.30 |                                                                       | 4.58 |                                        | 2.38 |                        | 1.52 |
| Socio-cultural         | Security                | (1) Decrease of social security                                                                 |                   | 3.33 |                                                                       | 4.02 |                                        | 3.45 |                        | 3.68 |
|                        |                         | (2) Level of tourist educational programmes                                                     |                   | 3.30 |                                                                       | 1.42 |                                        | 2.20 |                        | 2.05 |
|                        |                         | (3) Decrease of novel cultural and moral values among local residents                           |                   | 3.28 |                                                                       | 3.00 |                                        | 3.62 |                        | 2.30 |
|                        | Culture                 | (4) Decrease of loyalty to local values and traditions                                          | 2.65              | 3.11 | 2.98                                                                  | 3.21 | 2.88                                   | 3.60 | 2.71                   | 2.44 |
|                        |                         | (5) Increase of change in cultural of local communities from the current situation              |                   | 3.09 |                                                                       | 3.32 |                                        | 4.00 |                        | 2.62 |
|                        | Satisfaction            | (6) Increase of change in quality of life standards                                             |                   | 3.00 |                                                                       | 3.48 |                                        | 3.41 |                        | 1.75 |
|                        |                         | (7) Decrease of satisfaction of local communities                                               |                   | 2.82 |                                                                       | 3.40 |                                        | 3.28 |                        | 3.64 |

|                         |                        |                                                                                                                                |        |        |        |        |
|-------------------------|------------------------|--------------------------------------------------------------------------------------------------------------------------------|--------|--------|--------|--------|
| Economic- institutional | Participation          | (8) Decrease of participation in nature protection and development of sustainable ecotourism                                   | 3.55   | 3.71   | 3.24   | 3.76   |
|                         |                        | (9) Decrease of access to facilities and local infrastructure                                                                  | 1.38   | 2.66   | 3.07   | 3.40   |
|                         |                        | (10) Decrease of access to facilities and educational services                                                                 | 1.42   | 2.28   | 2.73   | 3.27   |
|                         | Justice                | (11) Increase of change in job opportunities for local communities                                                             | 2.85   | 2.95   | 2.51   | 3.20   |
|                         |                        | (12) Decrease of local household income                                                                                        | 2.20   | 3.11   | 2.26   | 2.80   |
|                         |                        | (13) Increase of cost of local households                                                                                      | 2.35   | 3.35   | 1.74   | 3.11   |
|                         | Population             | (14) Increase of migration of local residents                                                                                  | 2.50   | 2.57   | 1.37   | 1.40   |
|                         |                        | (15) Increase of change in density of local residents                                                                          | 1.62   | 2.36   | 2.80   | 1.32   |
|                         | Employment and income  | (1) Increase of change in various employments                                                                                  | 2.04   | 2.80   | 2.03   | 1.75   |
|                         |                        | (2) Increase of economic pressure among households                                                                             | 1.72   | 2.68   | 2.18   | 2.00   |
|                         |                        | (3) Increase of change in income of local communities                                                                          | 2.18   | 2.55   | 2.28   | 2.12   |
|                         | Cooperation            | (4) Increase of conflicts among governmental and non-governmental organisations                                                | 2.38   | 4.00   | 3.00   | 2.37   |
|                         |                        | (5) Decrease of cooperation among governmental and non-governmental organisations in planning and decision making              | 2.53   | 3.78   | 3.12   | 2.54   |
|                         | Monitoring and control | (6) Decrease of monitoring and control in protection of the area                                                               | 3.55   | 3.70   | 3.65   | 2.66   |
|                         |                        | (7) Decrease of monitoring and control on ecotourism activities                                                                | 3.21   | 3.55   | 4.05   | 2.48   |
|                         | Rules and regulations  | (8) Decrease of attention to protective rules and regulations                                                                  | 3.50   | 3.62   | 3.85   | 3.65   |
|                         |                        | (9) Decrease of implementation of strict legal guidelines                                                                      | 3.48   | 3.50   | 3.60   | 3.86   |
|                         |                        | (10) Decrease of access to local laws and regulations                                                                          | 3.35   | 3.20   | 3.52   | 3.40   |
|                         |                        | (11) Decrease of adherence to laws and regulations                                                                             | 3.30   | 3.42   | 3.43   | 3.48   |
|                         | Institutional element  | (12) Decrease of quality of governmental and non-governmental institutional performance (by increasing the number of tourists) | 3.17   | 3.25   | 3.38   | 3.22   |
|                         |                        | (13) Decrease of quality of managers performance in training and information (by increasing the number of tourists)            | 3.05   | 3.12   | 3.30   | 3.11   |
|                         |                        | (14) Decrease of quality of environmental guardians' performance in protection of area (by increasing the number of tourists)  | 2.8    | 2.90   | 3.21   | 3.05   |
|                         | Local price            | (15) Increase of prices, including commodities, accommodations, and property                                                   | 2.62   | 2.32   | 1.88   | 2.76   |
|                         | Economic activity      | (16) Increase of change in economic activities and income                                                                      | 1.45   | 2.15   | 1.75   | 2.88   |
|                         | Ethical principle      | (17) Decrease of beliefs and notice of ethical principles                                                                      | 1.38   | 1.76   | 1.56   | 1.52   |
| Total mean              |                        |                                                                                                                                | - 2.68 | - 3.05 | - 2.94 | - 2.76 |

**Table S6.** Mean levels for ecotourism impact indicators based on 5-point Likert scale ratings (very low to very high) by tourism management experts ( $n = 38$ ) for four different Protected Areas in Iran (results of round 2 of Delphi method). Gray highlights indicate the highest mean values, meaning the greatest impacts.

| Dimensions             | Variables               | Indicators                                                                                | Lar national park |      | Jajrud protected area |      | Tangeh Vashi national natural monument |      | Kavdeh wildlife refuge |      |
|------------------------|-------------------------|-------------------------------------------------------------------------------------------|-------------------|------|-----------------------|------|----------------------------------------|------|------------------------|------|
|                        |                         |                                                                                           | Mean dimensions   | Mean | Mean dimensions       | Mean | Mean dimensions                        | Mean | Mean dimensions        | Mean |
| Physical-environmental | Environmental pollution | (1) Increase of environmental pollution (water, soil, air, noise, and visual)             |                   | 3.41 |                       | 4.32 |                                        | 4.38 |                        | 3.58 |
|                        |                         | (2) Increase of destruction of natural ecosystems (mountains, forests, deserts, wetlands) |                   | 2.20 |                       | 4.25 |                                        | 4.30 |                        | 3.64 |
|                        |                         | (3) Increase of change in ecosystem structure and function                                |                   | 3.77 |                       | 4.50 |                                        | 4.22 |                        | 3.46 |
|                        | Ecosystem               | (4) Decrease of ecosystem services                                                        |                   | 3.28 |                       | 3.70 |                                        | 4.11 |                        | 3.34 |
|                        |                         | (5) Increase of habitat fragmentation                                                     |                   | 2.10 |                       | 4.55 |                                        | 4.00 |                        | 3.85 |
|                        |                         | (6) Increase of land use/land cover (LULC) changes                                        |                   | 1.94 |                       | 4.80 |                                        | 3.70 |                        | 3.20 |
|                        | Wildlife habitat        | (7) Increase of wildlife hunting (poaching)                                               |                   | 3.67 |                       | 3.46 |                                        | 3.22 |                        | 4.65 |
|                        |                         | (8) Increase of species extinction                                                        |                   | 3.54 |                       | 3.60 |                                        | 3.28 |                        | 4.40 |
|                        |                         | (9) Increase of wildlife migration                                                        |                   | 3.82 |                       | 3.56 |                                        | 2.58 |                        | 4.48 |
|                        |                         | (10) Increase of change in wildlife behaviour (feeding, migration, reproduction)          |                   | 3.50 |                       | 3.5  |                                        | 3.12 |                        | 4.27 |
|                        | Vegetation              | (11) Decrease of quality of vegetation                                                    |                   | 4.23 |                       | 3.36 |                                        | 2.23 |                        | 3.18 |
|                        |                         | (12) Increase of cut down trees and shrub                                                 |                   | 4.14 |                       | 3.24 |                                        | 3.36 |                        | 3.09 |
|                        |                         | (13) Decrease of high-density pasture                                                     |                   | 4.42 |                       | 3.42 |                                        | 3.68 |                        | 2.94 |
|                        |                         | (14) Increase of fires in forests and pastures                                            |                   | 3.27 |                       | 3.86 |                                        | 1.42 |                        | 2.84 |
|                        | Biodiversity            | (15) Decrease of biodiversity                                                             |                   | 3.38 |                       | 3.18 |                                        | 3.82 |                        | 4.15 |
|                        |                         | (16) Decrease of rare or dominant species                                                 | 2.77              | 3.26 | 3.14                  | 3.10 | 3.07                                   | 3.40 | 2.84                   | 3.18 |
|                        | Resources consumption   | (17) Decrease of renewable resources (water, soil, air)                                   |                   | 2.36 |                       | 2.74 |                                        | 3.36 |                        | 2.75 |
|                        |                         | (18) Increase of water resource consumption                                               |                   | 1.78 |                       | 2.82 |                                        | 3.30 |                        | 2.68 |
|                        | Waste and sewage        | (19) Increase of energy consumption and types of fuels                                    |                   | 3.25 |                       | 2.71 |                                        | 2.16 |                        | 2.57 |
|                        |                         | (20) Increase of waste generated by ecotourism                                            |                   | 3.10 |                       | 2.66 |                                        | 3.76 |                        | 2.33 |
|                        |                         | (21) Increase of sewage generated by ecotourism                                           |                   | 1.70 |                       | 2.57 |                                        | 3.63 |                        | 2.26 |
|                        | Safety                  | (22) Increase of accident rates                                                           |                   | 2.68 |                       | 1.30 |                                        | 3.52 |                        | 2.15 |
|                        |                         | (23) Increase of road traffic                                                             |                   | 2.80 |                       | 1.42 |                                        | 2.20 |                        | 1.88 |
|                        |                         | (24) Decrease of access to emergency services                                             |                   | 1.54 |                       | 1.58 |                                        | 2.28 |                        | 1.55 |
|                        | Environment/protection  | (25) Decrease of environmental health level                                               |                   | 1.23 |                       | 1.26 |                                        | 1.33 |                        | 1.27 |
|                        |                         | (26) Increase of destruction of natural, cultural, historical, and man-made attractions   |                   | 2.77 |                       | 2.38 |                                        | 3.45 |                        | 2.25 |
|                        |                         | (27) Increase of visiting time and presence of tourists in PAs                            |                   | 2.48 |                       | 3.38 |                                        | 3.40 |                        | 2.36 |
|                        |                         | (28) Increase of threat to strict natural zones and sensitive habitats                    |                   | 3.11 |                       | 2.47 |                                        | 3.16 |                        | 3.77 |
|                        |                         | (29) Increased numbers of tourists in PAs                                                 |                   | 2.48 |                       | 2.33 |                                        | 3.68 |                        | 1.77 |
|                        |                         | (30) Increase of tourists visit to the area                                               |                   | 1.22 |                       | 1.18 |                                        | 1.26 |                        | 1.22 |
|                        | Access                  | (31) Decrease of access to facilities and tourism infrastructure                          |                   | 1.38 |                       | 3.15 |                                        | 1.45 |                        | 1.51 |
|                        |                         | (32) Increase of road infrastructures and transportation networks                         |                   | 2.20 |                       | 4.62 |                                        | 2.36 |                        | 1.66 |
|                        |                         | (33) Increase of constructions and tourist accommodation                                  |                   | 1.45 |                       | 4.76 |                                        | 2.35 |                        | 1.52 |
| Social-cultural        | Security                | (1) Decrease of social security                                                           | 2.7               | 3.37 | 3                     | 4.00 | 2.93                                   | 3.46 | 2.76                   | 3.88 |
|                        |                         | (2) Level of tourist educational programmes                                               |                   | 3.32 |                       | 1.38 |                                        | 3.27 |                        | 2.11 |

|                         |                                                                                    |                                                                                                                                |        |      |      |      |     |      |      |      |
|-------------------------|------------------------------------------------------------------------------------|--------------------------------------------------------------------------------------------------------------------------------|--------|------|------|------|-----|------|------|------|
| Economic- institutional | Culture                                                                            | (3) Decrease of novel cultural and moral values among local residents                                                          | 3.33   | 2.74 | 3.06 | 2.98 | 2.8 | 3.17 | 3.60 | 2.35 |
|                         |                                                                                    | (4) Decrease of loyalty to local values and traditions                                                                         | 3.18   |      |      |      |     | 3.25 | 3.58 | 2.55 |
|                         | (5) Increase of change in cultural of local communities from the current situation |                                                                                                                                | 3.11   |      |      |      |     | 3.38 | 4.15 | 2.72 |
|                         | Satisfaction                                                                       | (6) Increase of change in quality of life standards                                                                            | 3.00   |      |      |      |     | 3.60 | 3.36 | 1.86 |
|                         |                                                                                    | (7) Decrease of satisfaction of local communities                                                                              | 2.75   |      |      |      |     | 3.48 | 3.25 | 3.58 |
|                         | Participation                                                                      | (8) Decrease of participation in nature protection and development of sustainable ecotourism                                   | 3.55   |      |      |      |     | 3.72 | 3.2  | 3.62 |
|                         |                                                                                    | (9) Decrease of access to facilities and local infrastructure                                                                  | 1.38   |      |      |      |     | 2.63 | 3.11 | 3.50 |
|                         | Justice                                                                            | (10) Decrease of access to facilities and educational services                                                                 | 1.48   |      |      |      |     | 2.27 | 2.73 | 3.32 |
|                         |                                                                                    | (11) Increase of change in job opportunities for local communities                                                             | 2.85   |      |      |      |     | 3.00 | 2.55 | 3.20 |
|                         |                                                                                    | (12) Decrease of local household income                                                                                        | 2.32   |      |      |      |     | 3.08 | 2.08 | 2.85 |
|                         |                                                                                    | (13) Increase of cost of local households                                                                                      | 2.45   |      |      |      |     | 3.30 | 1.52 | 3.15 |
|                         | Population                                                                         | (14) Increase of migration of local residents                                                                                  | 2.68   |      |      |      |     | 2.51 | 1.37 | 1.46 |
|                         |                                                                                    | (15) Increase of change in density of local residents                                                                          | 1.85   |      |      |      |     | 2.36 | 2.80 | 1.35 |
|                         | Employment and income                                                              | (1) Increase of change in various employments                                                                                  | 2.11   |      |      |      |     | 2.74 | 2.25 | 1.80 |
|                         |                                                                                    | (2) Increase of economic pressure among households                                                                             | 1.82   |      |      |      |     | 2.63 | 2.36 | 2.08 |
|                         |                                                                                    | (3) Increase of change in income of local communities                                                                          | 2.20   |      |      |      |     | 2.55 | 2.54 | 2.23 |
|                         | Cooperation                                                                        | (4) Increase of conflicts among governmental and non-governmental organisations                                                | 2.42   |      |      |      |     | 4.06 | 3.00 | 2.38 |
|                         |                                                                                    | (5) Decrease of cooperation among governmental and non-governmental organisations in planning and decision making              | 2.63   |      |      |      |     | 3.90 | 3.12 | 2.40 |
|                         | Monitoring and control                                                             | (6) Decrease of monitoring and control in protection of the area                                                               | 3.62   |      |      |      |     | 3.82 | 3.70 | 2.96 |
|                         |                                                                                    | (7) Decrease of monitoring and control on ecotourism activities                                                                | 3.32   |      |      |      |     | 3.61 | 4.00 | 2.58 |
|                         | Rules and regulations                                                              | (8) Decrease of attention to protective rules and regulations                                                                  | 3.51   |      |      |      |     | 3.70 | 3.80 | 3.7  |
|                         |                                                                                    | (9) Decrease of implementation of strict legal guidelines                                                                      | 3.48   |      |      |      |     | 3.52 | 3.72 | 3.84 |
|                         |                                                                                    | (10) Decrease of access to local laws and regulations                                                                          | 3.40   |      |      |      |     | 3.11 | 3.60 | 3.41 |
|                         |                                                                                    | (11) Decrease of adherence to laws and regulations                                                                             | 3.30   |      |      |      |     | 3.45 | 3.48 | 3.55 |
|                         | Institutional element                                                              | (12) Decrease of quality of governmental and non-governmental institutional performance (by increasing the number of tourists) | 3.18   |      |      |      |     | 3.30 | 3.37 | 3.33 |
|                         |                                                                                    | (13) Decrease of quality of managers performance in training and information (by increasing the number of tourists)            | 3.05   |      |      |      |     | 3.00 | 3.30 | 3.22 |
|                         |                                                                                    | (14) Decrease of quality of environmental guardians' performance in protection of area (by increasing the number of tourists)  | 2.85   |      |      |      |     | 2.80 | 3.22 | 3.05 |
|                         | Local price                                                                        | (15) Increase of prices, including commodities, accommodations, and property                                                   | 2.78   |      |      |      |     | 2.28 | 2.09 | 2.80 |
|                         | Economic activity                                                                  | (16) Increase of change in economic activities and income                                                                      | 1.53   |      |      |      |     | 1.88 | 1.66 | 2.70 |
|                         | Ethical principle                                                                  | (17) Decrease of beliefs and notice of ethical principles                                                                      | 1.37   |      |      |      |     | 1.72 | 1.55 | 1.72 |
| Total mean              |                                                                                    |                                                                                                                                | - 2.73 | -    | -    | -    | -   | 3.06 | 3    | 2.8  |

## References

- Bell, S., & Morse, S. 2001. Breaking through the glass ceiling: who really cares about sustainability indicators? *Local Environment*, 6:291–309.
- Bottrill, C.G. and Pearce, D.G. (1995) Ecotourism: towards a key elements approach to operationalising the concept. *Journal of Sustainable Tourism* 3, 45–54.
- Butler, R.W. 1999. Sustainable tourism: A state-of-the-art review. *Tourism Geographies*, 1(1), 7–25.
- Castellani, V. and Sala, S. 2010. Sustainable performance index for tourism policy development, *Tourism Management*, 31: 871–880.
- Céron, J. P., & Dubois, G. 2003. Tourism and sustainable development indicators: the gap between theoretical demands and practical achievements. *Curr. Issues Tourism*, 6 (1), 54–75.
- Chávez-Cortés, M., Maya, J. A. A. 2010. Identifying and structuring values to guide the choice of sustainability indicators for tourism development. *Sustainability*, 2 (9), 3074–3099.
- Dhakal S, Imura H. 2003. Policy-based indicators systems: emerging debates and lessons. *Local Environment*, 8, 113–9.
- Gabrielsen, P. & P. Bosch, 2003. *Environmental Indicators: Typology and Use in Reporting*. European Environment Agency. 20 p.
- Hall, C.M. (2000) *Tourism Planning: Policies, Processes and Relationships*. Pearson Education, Harlow, UK
- Innes, J. E., & Booher, D. E. 2000. Indicators for sustainable communities: a strategy building on complexity theory and distributed intelligence. *Plan Theor Pract*, 1, 173–86.
- Ko., T. G. 2005. Development of a tourism sustainability assessment procedure: A conceptual approach. *Tourism Management*, 26, 431–445.
- Lee, T. H. 2009. A structural model to examine how destination image, attitude, and motivation affect the future behavior of tourists. *Leis. Sci*, 31 (3), 215–236.
- Lee, T.H., & Hsieh, H. P. 2016. Indicators of sustainable tourism: a case study from a Taiwan's wetland. *Ecol. Ind.* 67, 779–787.
- Mascarenhas, A., Nunes, L. M., Ramos, T. B. 2015. Selection of sustainability indicators for planning: combining stakeholders' participation and data reduction techniques. *J. Cleaner Prod*, 92, 295–307.

- Miller, G. 2001. The development of indicators for sustainable tourism: results of a Delphi survey of tourism researchers. *Tourism Manage*, 22 (4), 351-362.
- Qiu, Q., Zheng, T., Xiang, Z., & Zhang, M. (2020). Visiting intangible cultural heritage tourism sites: from value cognition to attitude and intention. *Sustainability*, 12(1), 132.
- Saaty, T. L. 1996. *Decision Making with Dependence and Feedback: The Analytic Network Process*. RWS Publications, Pittsburgh, PA.
- Sigala, M. (2012). Exploiting Web 2.0 for new service development: findings and implications from the Greek tourism industry. *International Journal of Tourism Research*, 14(6), 551–566
- Taghvaei, M & Akbari, M. 2010. *Introduction to Urban Planning and Tourism Management* Isfahan, Iran: Alavi Publications.
- Tanguay, G. A., Rajaonson, J., Therrien, M. C. 2013. Sustainable tourism indicators: selection criteria for policy implementation and scientific recognition. *J. Sustainable Tourism*, 21 (6), 862-879.
- Torres-Delgado, A., & Palomeque, F. L. 2014. Measuring sustainable tourism at the municipal level. *Ann. Tourism Res*, 49, 122–13.
- Tucker, H. (2020). Gendering sustainability's contradictions: between change and continuity. *Journal of Sustainable Tourism*, 1-18.
- Wang., S. H, Lee., M.T, Château., P. A., Chang., Y. C. 2016. Performance indicator framework for evaluation of sustainable tourism in the Taiwan Coastal Zone. *Sustainability* 8 (7), 652.
- White, V., McCrum, G., Blackstock, K. L., & Scott, A. (2006). *Indicators and sustainable tourism: Literature review*. The Macaulay Institute. Aberdeen.
- Yoon., Y, Gursoy., D., Chen., J. S. 2001. Validating a tourism development theory with structural equation modeling. *Tourism Manage*, 22 (4), 363–372.
- Zhang, H. Q., Fan, D. X. F., Tse, T. S. M., King, B. 2017. Creating a scale for assessing socially sustainable tourism. *J. Sustainable Tourism* 25 (1), 61–78.
- Zhang, Y., Xiao, X., Zheng, C., Xue, L., Guo, Y., & Wu, Q. (2020). Is tourism participation in protected areas the best livelihood strategy from the perspective of community development and environmental protection?. *Journal of Sustainable Tourism*, 28(4), 587-605.
